# Supplementary material for: Antimony selenide/graphene oxide composite for sensitive photoelectrochemical detection of DNA methyltransferase activity
Source: Royal Society of Chemistry journal article supplement (doi:10.1039/c9tb01541h), 2019-01-01
Supplement: c9tb01541h1.pdf [file c9tb01541h1.pdf]

## **Supporting Information**

# **Antimony Selenide/Graphene Oxide Composite for Sensitive Photoelectrochemical Detection of DNA Methyltransferase Activity**

Huaijia Xue, Kaiyang Chen, Qing Zhou, Deng Pan, Yuanjian Zhang and Yanfei  
Shen\*

Medical School, School of Chemistry and Chemical Engineering, Southeast University,  
Nanjing 210009, China.

Email: Yanfei.Shen@seu.edu.cn

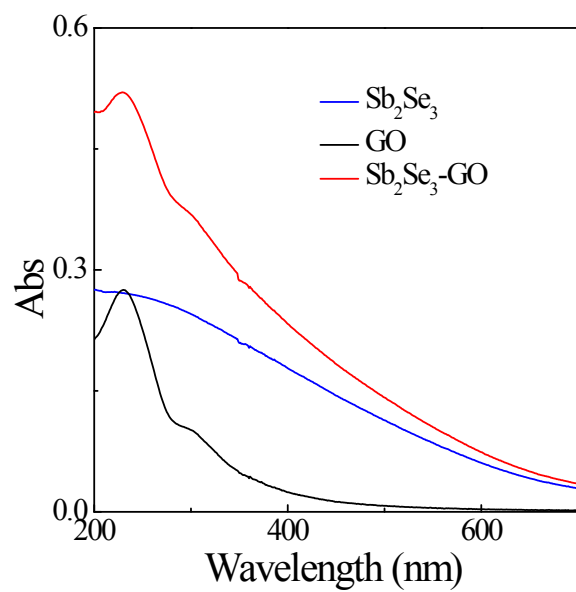

**Fig. S1** UV-vis absorption spectra of Sb<sub>2</sub>Se<sub>3</sub>, GO and Sb<sub>2</sub>Se<sub>3</sub>-GO.

### Optimization of experimental conditions.

To optimize the performance of the PEC immunosensor for Dam MTase detection, the ratio of GO to  $\text{Sb}_2\text{Se}_3$  was optimized.

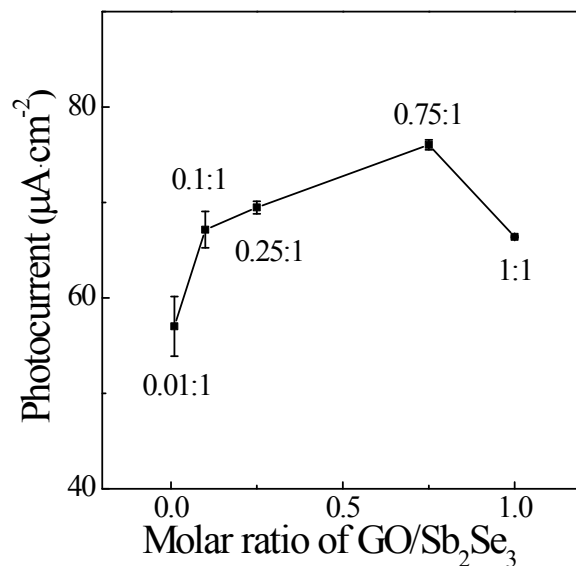

**Fig. S2** Photocurrent responses of different molar ratios of  $\text{GO}:\text{Sb}_2\text{Se}_3$  in  $\text{Sb}_2\text{Se}_3$ -GO composites.

As revealed in Fig. S2, the photocurrent increased when the molar ratio of  $\text{GO}:\text{Sb}_2\text{Se}_3$  increased from 0.01:1 to 0.75:1, which could be ascribed to the increased carboxyl groups on the surface of GO and the subsequent increase in hDNA capture, thereby increasing the capture of S1-Au NPs. Upon further increasing the relative content of GO, the photocurrent intensity gradually decreased, probably due to the poor conductivity of GO. Thus, a  $\text{GO}:\text{Sb}_2\text{Se}_3$  molar ratio of 0.75:1 was selected as the optimized value for the following biosensing studies.
